# Supplementary material for: Mitotic Checkpoint Kinase Mps1 Has a Role in Normal Physiology which Impacts Clinical Utility
Source: PubMed Central journal article supplement (PMC4580473; doi:10.1371/journal.pone.0138616), 2015-09-23
Supplement: pone.0138616.s010.pdf [file pone.0138616.s010.pdf]

|                       | PF-3837                 | PF-7006 |            |                         |
|-----------------------|-------------------------|---------|------------|-------------------------|
| Kinase                | % Inhibition at 1000 nM |         | Service    | Kinase                  |
| ABL1 (ABL)            | 11                      |         | Invitrogen | MLCK (MYLK)             |
| AKT1 (AKT)            | -1                      |         | Dundee     | MLCK_sk (MYLK2)         |
| AKT1 (AKT)            | -2                      | -3      | Invitrogen | MLK1 (MAP3K9)           |
| AKT2                  | -7                      | -8      | Dundee     | MLK3 (MAP3K11)          |
| AKT3                  | 4                       |         | Invitrogen | MNK1 (MKNK1)            |
| AMPKa2 (rat PRKAA2)   |                         | 10      | Dundee     | MNK2 (MKNK2)            |
| AURA (AURKA)          | 9                       | 9       | Invitrogen | MSK1 (RPS6KA5)          |
| AURB (AURKB)          | 19                      | 17      | Dundee     | MSK1 (RPS6KA5)          |
| BTK                   | 2                       |         | Invitrogen | MSK2 (RPS6KA4)          |
| CAMK1 (CaMK1a)        | 19                      | 30      | Dundee     | MST2 STK3)              |
| CAMK2A (CaMKIIa)      | 11                      | 4       | Invitrogen | MST4                    |
| CAMKK2 (CAMKKB)       | 16                      | 10      | Dundee     | NEK2                    |
| CDK2 /CyclinA         | 65                      | 39      | Invitrogen | NEK6                    |
| CHK1 (CHEK1)          | 6                       | 6       | Invitrogen | NTRK1 (TRKA)            |
| CHK2 (CHEK2)          | 41                      | 15      | Invitrogen | NTRK1 (TRKA)            |
| CKIa (CSNK1A1)        | 45                      | 19      | Invitrogen | NuaK1                   |
| CKId (rat CSNK1D)     | 45                      | 79      | Dundee     | p38 (MAPK14) direct     |
| CKIIa (CSNK2A1)       | 19                      | 27      | Dundee     | p38d MAPK13)            |
| CKIIa (CSNK2A1)       | 10                      |         | Invitrogen | p38g (MAPK12)           |
| CKIIa (CSNK2A2 prime) | 5                       | 2       | Invitrogen | p70S6K (RPS6KB1)        |
| CSK                   | -4                      | 16      | Dundee     | PAK4                    |
| DYRK1A (MNB)rat       | 92                      | 89      | Dundee     | PBK                     |
| DYRK2                 | 74                      | 24      | Dundee     | PDK1 (PDPK1) (directed) |
| EEF2K (EEF-2 kinase)  | -6                      | 7       | Dundee     | PIM1                    |
| EGFR                  | 8                       | 0       | Invitrogen | PIM2                    |
| EphA2                 | 3                       | -4      | Invitrogen | PIM3                    |
| ERBB4 (HER4)          | 34                      | 13      | Dundee     | PKACa (PRKACA)          |
| ERK2 (MAPK1)          | 32                      | 62      | Invitrogen | PKCa (PRKCA)            |
| ERK7 (MAPK15)         | 79                      | 81      | Dundee     | PKD1 (PRKD1)            |
| FGFR1                 | 5                       | -1      | Invitrogen | PKG1 (PRKG1)            |
| GCK (HK4)             | 31                      | 28      | Dundee     | PKN1 (PRK1)             |
| GSK3b                 | 59                      | 21      | Invitrogen | PKN2 (PRK2)             |
| IKKb (IKBKB)          | 21                      | 14      | Dundee     | PLK1 preactivated       |
| IRAK4                 | 5                       | 28      | Dundee     | ROCK1 (ROCKI)           |
| IRK (INSR)            | 23                      | 21      | Invitrogen | ROCK2 (ROCKII) rat      |
| JAK3                  | 9                       | 1       | Invitrogen | RSK1 (rat RPS6KA1)      |
| JNK1a (MAPK8)         | 98                      | 97      | Dundee     | RSK2 (RPS6KA3)          |
| JNK2 (MAPK9)          | 96                      | 91      | Dundee     | SGK1 (SGK)              |
| KDR (KDRVEGF)         | 13                      | -4      | Invitrogen | SRC                     |
| LCK                   | 12                      | 3       | Invitrogen | SRPK1                   |
| LCK (murine)          | 6                       | 20      | Dundee     | TAK1 (MAP3K7)           |
| LKB1 (STK11)          | 20                      | 26      | Dundee     | TAOK2 (TAO2)            |
| MAPKAPK2 (MK2)        | 6                       | 2       | Invitrogen | TIE2 (TEK)              |
| MAPKAPK5              | 4                       | -8      | Dundee     | TTK (Mps1)              |
| MARK1                 | 9                       | 3       | Invitrogen | ZAP70                   |

|                      |    |    |            |
|----------------------|----|----|------------|
| MARK3                | 15 | 23 | Dundee     |
| MEK1 (rabbit MAP2K1) | 26 | 66 | Dundee     |
| MET (HGFR)           | -1 | 4  | Invitrogen |

|              |
|--------------|
| ZC1 (MAP4K4) |
| ZC3 (MINK1)  |

| PF-3837                 | PF-7006 |            |
|-------------------------|---------|------------|
| % Inhibition at 1000 nM |         | Service    |
| 18                      | 35      | Dundee     |
| 14                      | 0       | Invitrogen |
| 0                       | 16      | Dundee     |
|                         | 35      | Dundee     |
| 13                      | -14     | Dundee     |
| 13                      | 17      | Dundee     |
| 8                       |         | Invitrogen |
| -4                      | 11      | Dundee     |
| 4                       |         | Invitrogen |
| 23                      | 2       | Invitrogen |
| 59                      | 7       | Invitrogen |
| -1                      | 0       | Invitrogen |
| 8                       | 16      | Dundee     |
| 13                      | 9       | Dundee     |
| 11                      | 25      | Invitrogen |
| 88                      | 84      | Dundee     |
| 1                       | 5       | Invitrogen |
| 28                      | 32      | Dundee     |
| 3                       | 23      | Dundee     |
| -3                      | -10     | Dundee     |
| 18                      | -2      | Invitrogen |
| 44                      | 36      | Dundee     |
| 2                       | 2       | Invitrogen |
| 9                       | 23      | Dundee     |
| 6                       | -5      | Invitrogen |
| 35                      | 22      | Dundee     |
| 1                       | -3      | Invitrogen |
| -2                      | 7       | Dundee     |
| 71                      | 57      | Dundee     |
| 11                      |         | Invitrogen |
| 5                       |         | Invitrogen |
| -9                      | 23      | Dundee     |
| -2                      | -1      | Dundee     |
| 6                       | 2       | Invitrogen |
| -3                      | 22      | Dundee     |
| 14                      | 33      | Dundee     |
| -7                      | 3       | Dundee     |
| 8                       | 3       | Invitrogen |
| 10                      | -2      | Invitrogen |
| -1                      | 10      | Dundee     |
| 91                      | 71      | Dundee     |
| 23                      | 3       | Invitrogen |
| 5                       | -1      | Invitrogen |
| 45                      | 35      | Dundee     |
| 6                       |         | Invitrogen |

|    |    |            |
|----|----|------------|
| 70 | 18 | Invitrogen |
| 40 | 17 | Dundee     |
